# Supplementary material for: O-GlcNAc transferase in astrocytes modulates depression-related stress susceptibility through glutamatergic synaptic transmission
Source: PubMed Central journal article supplement (PMC10065078; doi:10.1172/jci160016), 2023-04-03
Supplement: jci-133-160016-s056.pdf [file jci-133-160016-s056.pdf]

Supplementary Table 1. Participants' demographics and clinical characteristics

| Characteristic            | Male            |               | <i>p</i> value |
|---------------------------|-----------------|---------------|----------------|
|                           | Healthy control | MDD           |                |
| n                         | 38              | 33            |                |
| Age (Years)               | 26.18 ± 0.7991  | 28.27 ± 1.852 | 0.8971         |
| Family history            | 1/38            | 13/33         | 0.001          |
| First episode (%)         | NA              | 10/33         |                |
| On-set age (years)        | NA              | 23.28         |                |
| Disease duration (months) | NA              | 59.53         |                |
| Bipolar depression        | NA              | 10/33         |                |
|                           | Female          |               |                |
|                           | Healthy control | MDD           |                |
| n                         | 39              | 37            |                |
| Age (Years)               | 24.79 ± 0.4890  | 26.08 ± 1.369 | 0.8092         |
| Family history            | 2/39            | 11/37         | 0.0056         |
| First episode (%)         | NA              | 7/37          |                |
| On-set age (years)        | NA              | 22.72         |                |
| Disease duration (months) | NA              | 68.52         |                |
| Bipolar depression        | NA              | 11/37         |                |

NA, Not Available; All data are all presented as the mean ± SEM.

Supplementary Table 2. Male participants' depression symptom characteristics

| Characteristic         | Male            |                | <i>p</i> value |
|------------------------|-----------------|----------------|----------------|
|                        | Healthy control | MDD            |                |
| HAMD-Diurnal variation |                 |                |                |
| n                      | 38              | 33             |                |
| SCL-90                 | 27.00 ± 1.73    | 180.80 ± 12.51 | <0.0001        |
| HAMD-24                | 3.29 ± 0.2208   | 36.88 ± 0.4214 | <0.0001        |
| HAMD-Anxiety           | 0.63 ± 0.1027   | 3.76 ± 0.2821  | <0.0001        |
| HAMD-Weight            | 0.21 ± 0.0670   | 0.97 ± 0.1409  | <0.0001        |
| HAMD-Cognition         | 0.24 ± 0.0879   | 9.76 ± 0.4905  | <0.0001        |
| HAMD-Diurnal variation | 0.21 ± 0.0769   | 1.06 ± 0.1372  | <0.0001        |
| HAMD-Retardation       | 0.26 ± 0.0816   | 6.88 ± 0.3131  | <0.0001        |
| HAMD-Sleep             | 0.66 ± 0.1149   | 5.18 ± 0.2016  | <0.0001        |
| HAMD-Hopeless          | 0.61 ± 0.1036   | 7.85 ± 0.2987  | <0.0001        |
| HAMD-Suicide           | 0               | 1.49 ± 0.1385  | <0.0001        |

SCL-90: Symptom Check List 90; HAMD-24: 24-item Hamilton Depression Scale; HAMD-Anxiety: Hamilton Depression Scale-Anxiety/somatization factor; HAMD-Weight: Hamilton Depression Scale-Loss of weight factor; HAMD-Cognition: Hamilton Depression Scale-Cognitive factor; HAMD-Diurnal Variation: Hamilton Depression Scale-Diurnal variation factor; HAMD-Retardation: Hamilton Depression Scale-Retardation factor; HAMD-Sleep: Hamilton Depression Scale-Sleep disorder factor; HAMD-Hopeless: Hamilton Depression Scale-Hopeless, helpless, and worthless factor; HAMD-Suicide: Hamilton Depression Scale-Suicide factor. All data are all presented as the mean ± SEM.

Supplementary Table 3. Female participants' depression symptom characteristics

| Characteristic         | Male            |                | <i>p</i> value |
|------------------------|-----------------|----------------|----------------|
|                        | Healthy control | MDD            |                |
| HAMD-Diurnal variation |                 |                |                |
| n                      | 39              | 37             |                |
| SCL-90                 | 25.31 ± 1.272   | 186.4 ± 12.37  | <0.0001        |
| HAMD-24                | 3.10 ± 0.2888   | 37.03 ± 0.3818 | <0.0001        |
| HAMD-Anxiety           | 0.69 ± 0.1049   | 4.37 ± 0.2757  | <0.0001        |
| HAMD-Weight            | 0.13 ± 0.0655   | 1.03 ± 0.1162  | <0.0001        |
| HAMD-Cognition         | 0.41 ± 0.1021   | 10.37 ± 0.4140 | <0.0001        |
| HAMD-Diurnal variation | 0.36 ± 0.1005   | 1.26 ± 0.1111  | <0.0001        |
| HAMD-Retardation       | 0.33 ± 0.0925   | 5.61 ± 0.2836  | <0.0001        |
| HAMD-Sleep             | 0.85 ± 0.1401   | 4.84 ± 0.1942  | <0.0001        |
| HAMD-Hopeless          | 0.33 ± 0.0995   | 7.71 ± 0.2870  | <0.0001        |
| HAMD-Suicide           | 0               | 1.87 ± 0.1776  | <0.0001        |

SCL-90: Symptom Check List 90; HAMD-24: 24-item Hamilton Depression Scale; HAMD-Anxiety: Hamilton Depression Scale-Anxiety/somatization factor; HAMD-Weight: Hamilton Depression Scale-Loss of weight factor; HAMD-Cognition: Hamilton Depression Scale-Cognitive factor; HAMD-Diurnal Variation: Hamilton Depression Scale-Diurnal variation factor; HAMD-Retardation: Hamilton Depression Scale-Retardation factor; HAMD-Sleep: Hamilton Depression Scale-Sleep disorder factor; HAMD-Hopeless: Hamilton Depression Scale-Hopeless, helpless, and worthless factor; HAMD-Suicide: Hamilton Depression Scale-Suicide factor. All data are all presented as the mean ± SEM.
